# Supplementary material for: Infectious keratoconjunctivitis and occurrence of Mycoplasma conjunctivae and Chlamydiaceae in small domestic ruminants from Central Karakoram, Pakistan
Source: PubMed Central journal article supplement — Vet Rec. 2017 Sep 1;181(9):237. doi: 10.1136/vr.103948 (PMC5738590; doi:10.1136/vr.103948), 2017-09-01
Supplement: vetrec-2016-103948supp001.pdf [file vetrec-2016-103948supp001.pdf]

## Supplementary Material

**Table S1. Primers for DNA sequence analyses.** Primers used in this study for PCR, nested PCR and Sanger DNA sequence analysis of *M. conjunctivae*.

| <b>Primer</b> | <b>Sequence (5'-3')</b>  | <b>Position <sup>a</sup></b> | <b>Use</b>             |
|---------------|--------------------------|------------------------------|------------------------|
| Serstart3     | TTTAGTAGACTCCACTTCACC    | 3731-3751                    | PCR                    |
| Serstart2     | CACTATACTTAACAGATAGTCC   | 3781-3802                    | Nested PCR, Sequencing |
| Serstart0     | ATACTCAAAGTGGAAATAATGGAA | 3979-4002                    | Sequencing             |
| Serend0       | GCAACAACAATAGTAAGAGCAG   | 4743-4764                    | Sequencing             |
| lppTA2        | TTTGATCTCTCCACCTTCAGC    | 5113-5093                    | PCR                    |
| lppTA         | GGCACTAATAGTGCGTAATTC    | 5065-5045                    | Nested PCR             |

<sup>a</sup> corresponding to GenBank/EMBL nucleotide sequence accession number AJ318939.
